# Supplementary material
Source: PubMed Central journal article supplement (PMC8047441)
Supplement: EMBJ-40-e106283-s004.pdf [file EMBJ-40-e106283-s004.pdf]

# **ATAD3B Mediates the Clearance of Oxidative Stress-induced Damaged mtDNA**

## **by Acting as a Mitophagy Receptor**

Li Shu, Chao Hu, Meng Xu, Jianglong Yu, He He, Jie Lin, Hongying Sha, Bin Lu, Simone Engelender, Minxin Guan, and Zhiyin Song

### **Appendix**

#### **Table of Contents**

|                         |      |
|-------------------------|------|
| Appendix Figure legends | 2-4  |
| Appendix Figure S1      | 5    |
| Appendix Figure S2      | 6    |
| Appendix Figure S3      | 7    |
| Appendix Figure S4      | 8    |
| Appendix Table S1       | 9-10 |
| Appendix Table S2       | 11   |

## Appendix Figure Legends

### Appendix Figure S1. Autophagy contributes to the clearance of H<sub>2</sub>O<sub>2</sub>-induced damaged mtDNA.

A. HeLa, MEF, and HEK293 were used for the extraction of total DNA. DNA samples were used for amplification of 8.9 kb mtDNA(human), 12.2 kb nDNA(human), 10 kb mtDNA (mouse), or 6.6 kb nDNA (mouse) fragments, and PCR products were run in agarose gel electrophoresis (AGE).

B. Control or shATG5 HEK293 cells were treated with DMSO, 100  $\mu$ M H<sub>2</sub>O<sub>2</sub> or 200  $\mu$ M H<sub>2</sub>O<sub>2</sub> for 2 h. After the treatment, cells were immediately harvested or washed with fresh medium and incubated for another 1 h. Cells with or without washout were used for extracting total DNA. All DNA samples were used for amplification of 8.9 kb mtDNA fragment using quantitative PCR and quantitated by PicoGreen staining using Micro Plate Reader. Error bars are presented as mean  $\pm$  SD (n = 3 independent experiments), statistical significance was assessed by two-tailed student's t-test, N.S., not significant, \*p < 0.05, \*\*p < 0.01.

C. Control or shATG5 HEK293 cell lysates were analyzed by Western blotting with anti-ATG5 or anti-Tubulin antibodies.

D-F. HEK293 (D), HeLa (E) and MEF (F) were treated with DMSO or 200  $\mu$ M H<sub>2</sub>O<sub>2</sub> for 2 h. After the treatment, cells were then harvested or washed with fresh medium and incubated for another 1 h. Cells with or without washout were used for extracting total DNA. All DNA samples were used for amplification of human 12.2 kb nDNA segments (HEK293 and HeLa) or mouse 6.6 kb nDNA segments (MEFs) using quantitative PCR and quantitated by PicoGreen staining using Micro Plate Reader. Error bars are presented as mean  $\pm$  SD (n = 3 independent experiments), statistical significance was assessed by two-tailed student's t-test, N.S., not significant, \*p < 0.05.

G. HeLa cells were incubated with DMSO, 200  $\mu$ M H<sub>2</sub>O<sub>2</sub> or 4 mM 3-NPA for 2 h, and then stained with mitoSOX and analyzed by confocal microscopy. Quantification of relative MitoSOX intensity was shown at right panels. Error bars are presented as mean  $\pm$  SD (n =6 pictures), statistical significance was assessed by a one-way ANOVA, N.S., not significant, \*\*\*p < 0.001. Scale bar, 25  $\mu$ m.

H. HeLa cells were treated with DMSO or 200 $\mu$ M H<sub>2</sub>O<sub>2</sub> for 2 h, and were imaged by transmission electron microscopy, the red arrowhead indicates autophagosome, and the yellow arrowheads indicate the mitochondria. Scale bar, 500 nm.

I. HeLa WT were treated with DMSO, 200  $\mu$ M H<sub>2</sub>O<sub>2</sub> or 10  $\mu$ M FCCP for 2 h, and incubated with TMRM (600 nm, 25 min), then analyzed by confocal microscopy. Quantification of relative membrane potential was shown at right panels. Error bars are presented as mean  $\pm$  SD (n= 3 independent experiments, 20 cells per experiment), statistical significance was assessed by a one-way ANOVA, \*\*\*p < 0.001. Scale bar, 25  $\mu$ m.

### **Appendix Figure S2. Knockdown effect of mtDNA nucleoid-related proteins.**

A-C. Control or mtDNA nucleoid-associated proteins (indicated proteins) were depleted in HeLa cells by short hairpin RNA interference. Cell lysates were analyzed by Western blotting using the indicated antibodies (A). The effect of POLMRT (B) or POLG2 (C) knockdown was analyzed by quantitative PCR.

### **Appendix Figure S3. Alignment and expression of human ATAD3A and ATAD3B.**

A. Human ATAD3A and ATAD3B protein sequences were aligned by Clustal X (version 2.1) software.

B. Phylogenetic tree based on ATAD3A and ATAD3B protein sequences. ATAD3A and ATAD3B protein sequences were analyzed with Molecular Evolutionary Genetics Analysis (date from NCBI).

C. Expression levels of human ATAD3A and ATAD3B in different tissues (data from HumanProteome Map).

### **Appendix Figure S4. ATAD3B regulates mitophagy in a PINK1-independent manner.**

A. PINK1 KO HeLa cells stably expressing mito-Keima were infected with lentiviral particles containing control, ATAD3A-Flag or ATAD3B-Flag. Five days later, cells were treated with DMSO, H<sub>2</sub>O<sub>2</sub> (200  $\mu$ M, 2 h), or OA (2.5 mM oligomycin plus 250 nM antimycin A, 4 h). Cells were then imaged with 458 nm (measuring mitochondria with a neutral pH) and 561 nm (measuring mitochondria with an acidic pH) laser excitation for mito-Keima by confocal microscopy. Scale bar, 10  $\mu$ m.

B. Quantification of the relative ratio of red to green fluorescence intensity (561nm/458nm) of the cells described in (A). Error bars are presented as mean  $\pm$  SD (n= 3 independent experiments, 20 cells per experiment), statistical significance was assessed by two-tailed student's t-test, N.S., not significant, \*p < 0.05, \*\*p < 0.01.

C. PINK1 KO HeLa cells expressing mt-Keima were infected with lentiviral particles containing control, ATAD3A-Flag or ATAD3B-Flag. Five days later, cell lysates were analyzed by Western blotting with anti-ATAD3 or anti-Tubulin antibodies.

D. Control or PINK1 KO HeLa cells were treated with or without OA (10  $\mu$ M oligomycin, 4  $\mu$ M antimycin A) for 4 h, and cell lysates were analyzed by Western blotting with anti-PINK1 or anti-Tubulin antibodies. The asterisk indicates an unspecific band.

E. HEK293 or A549 were treated with DMSO, H<sub>2</sub>O<sub>2</sub> (100  $\mu$ M, 200  $\mu$ M or 500  $\mu$ M, 2 h), or OA (2.5 mM oligomycin plus 250 nM antimycin A, 4 h). Cell lysates were then analyzed by Western blotting with anti-PINK1 or anti-GAPDH antibodies. The asterisk indicates an unspecific band.

F. Control or shATAD3B PINK1 KO HeLa cell lines were lysed and analyzed by Western blotting with anti-ATAD3 or anti-Tubulin antibodies.

# Appendix Figure S1

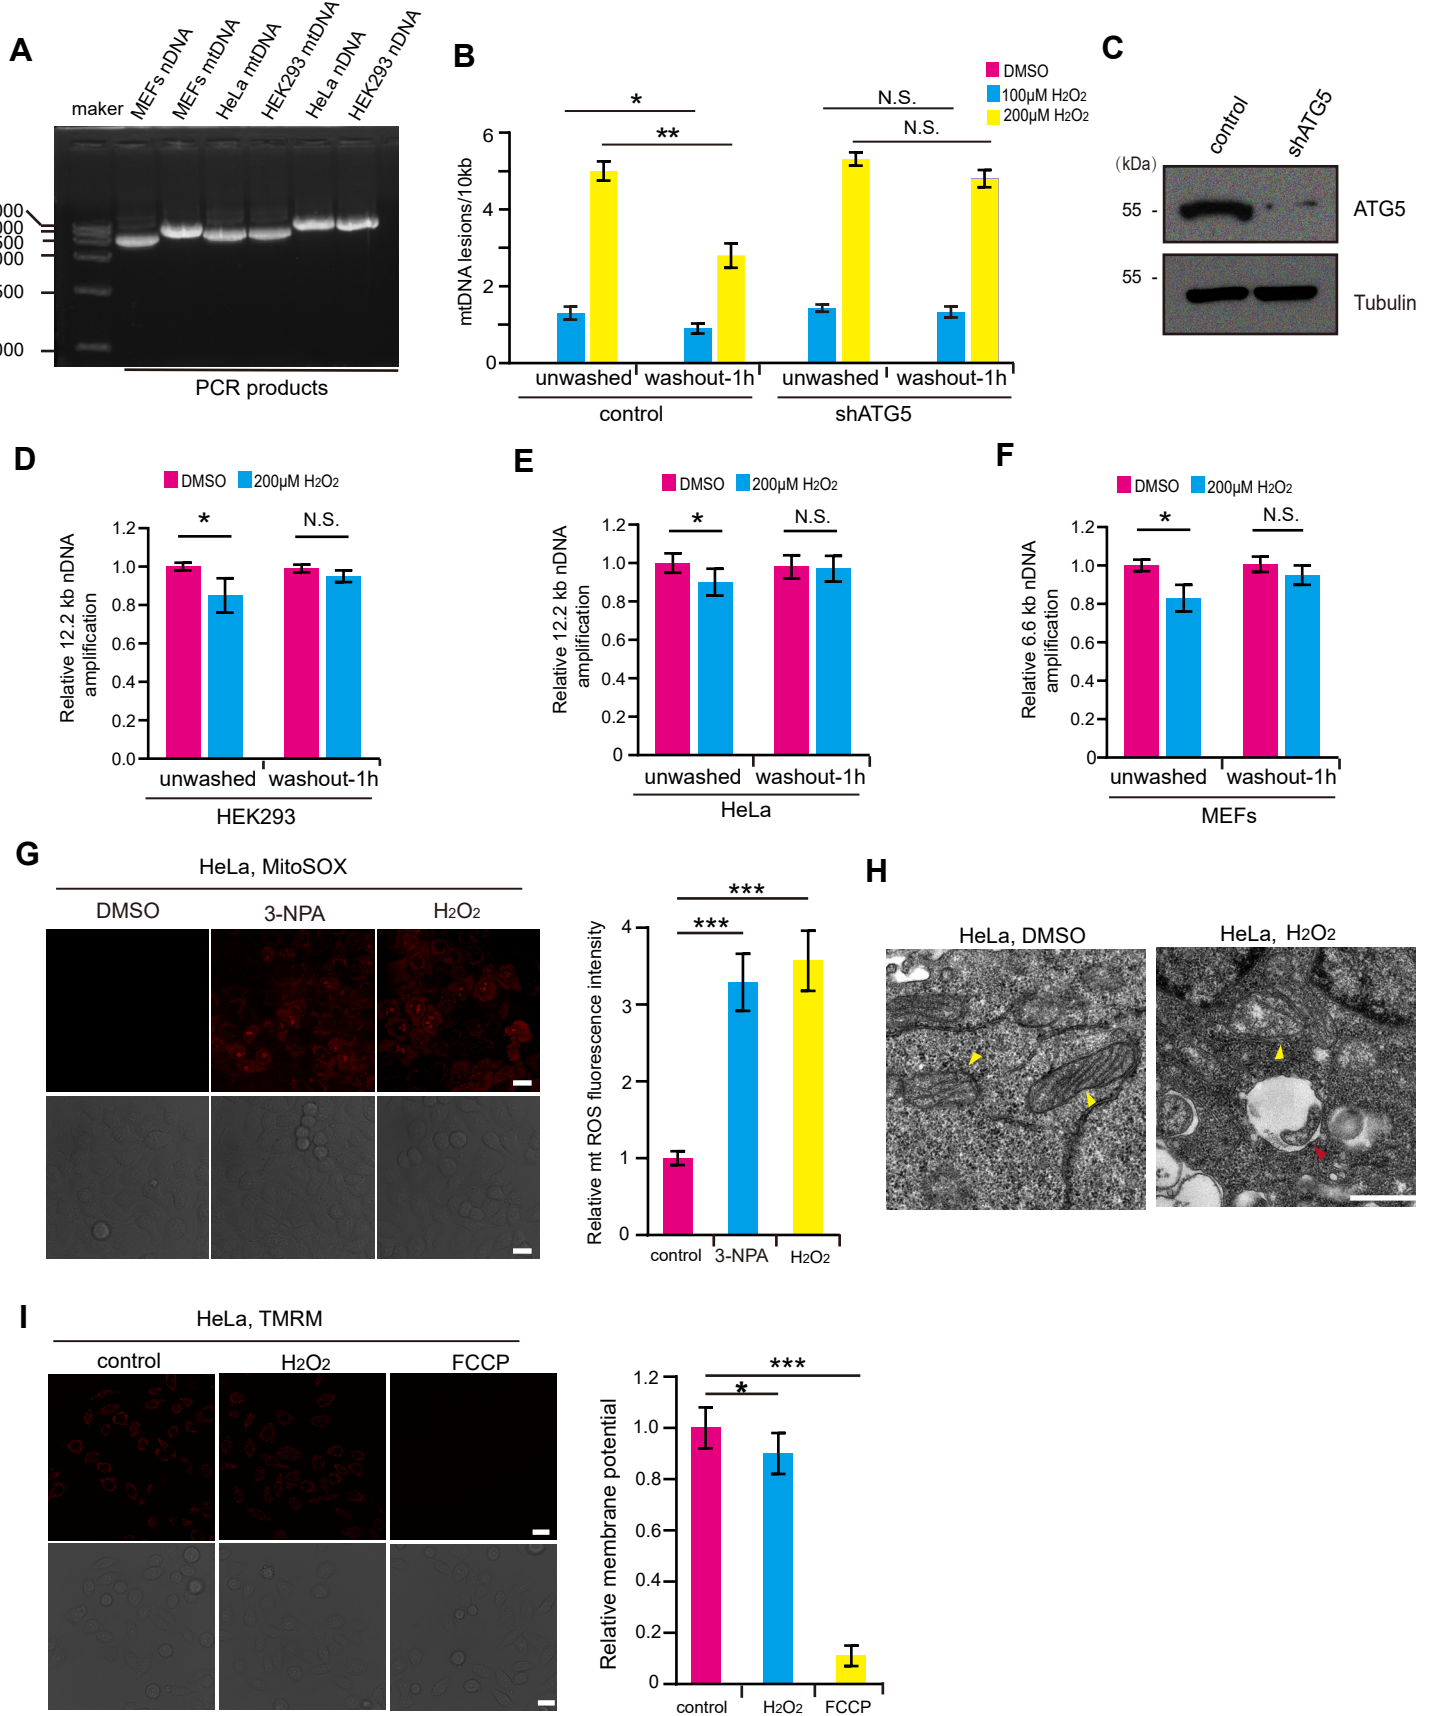

## Appendix Figure S2

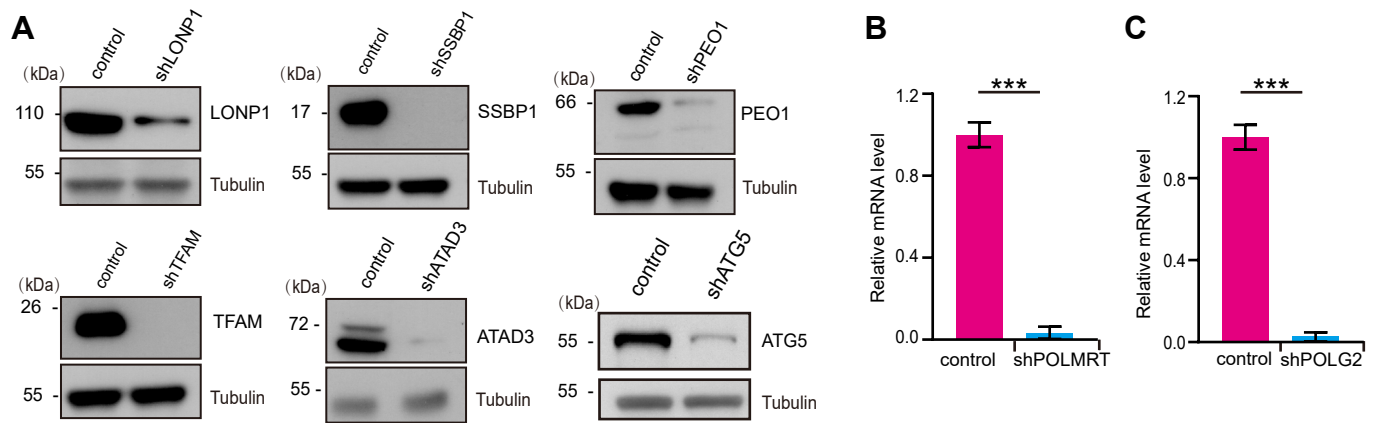

# Appendix Figure S3

**A**

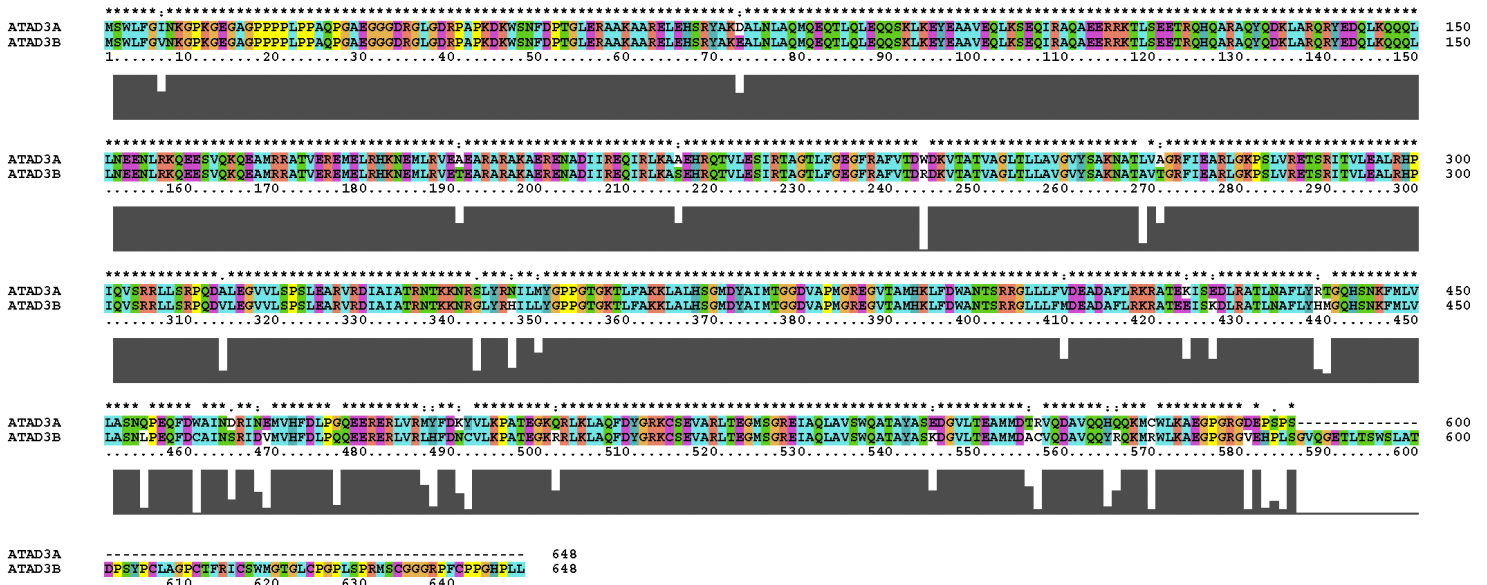

**B**

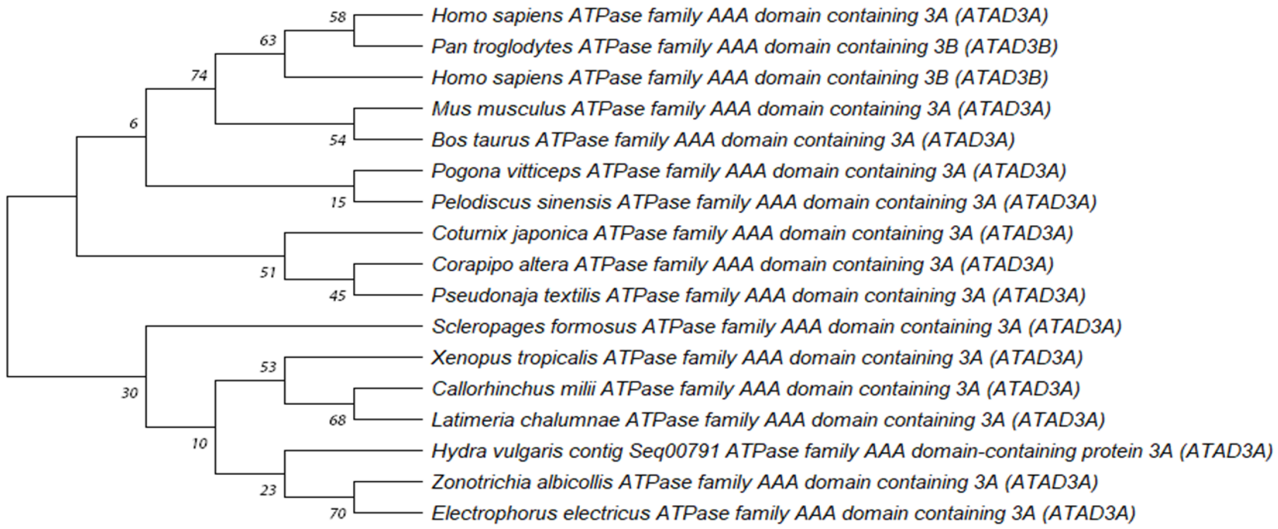

**C**

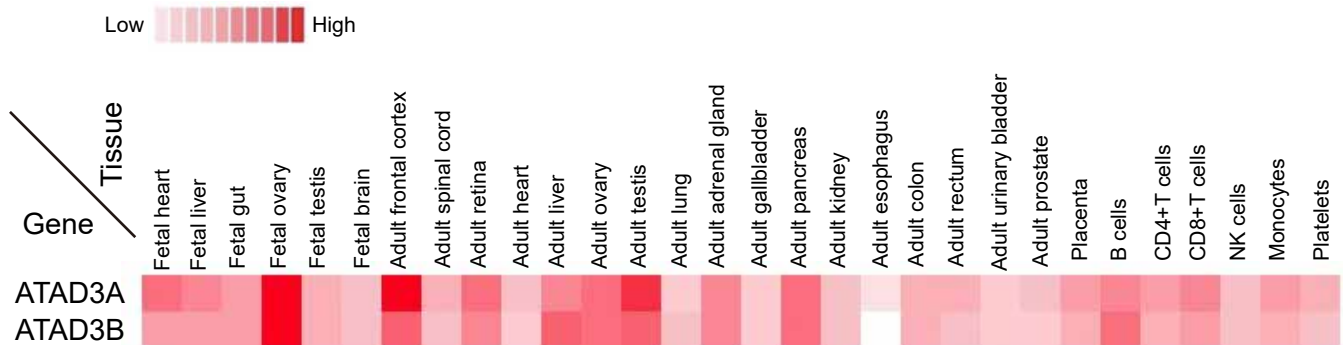

# Appendix Figure S4

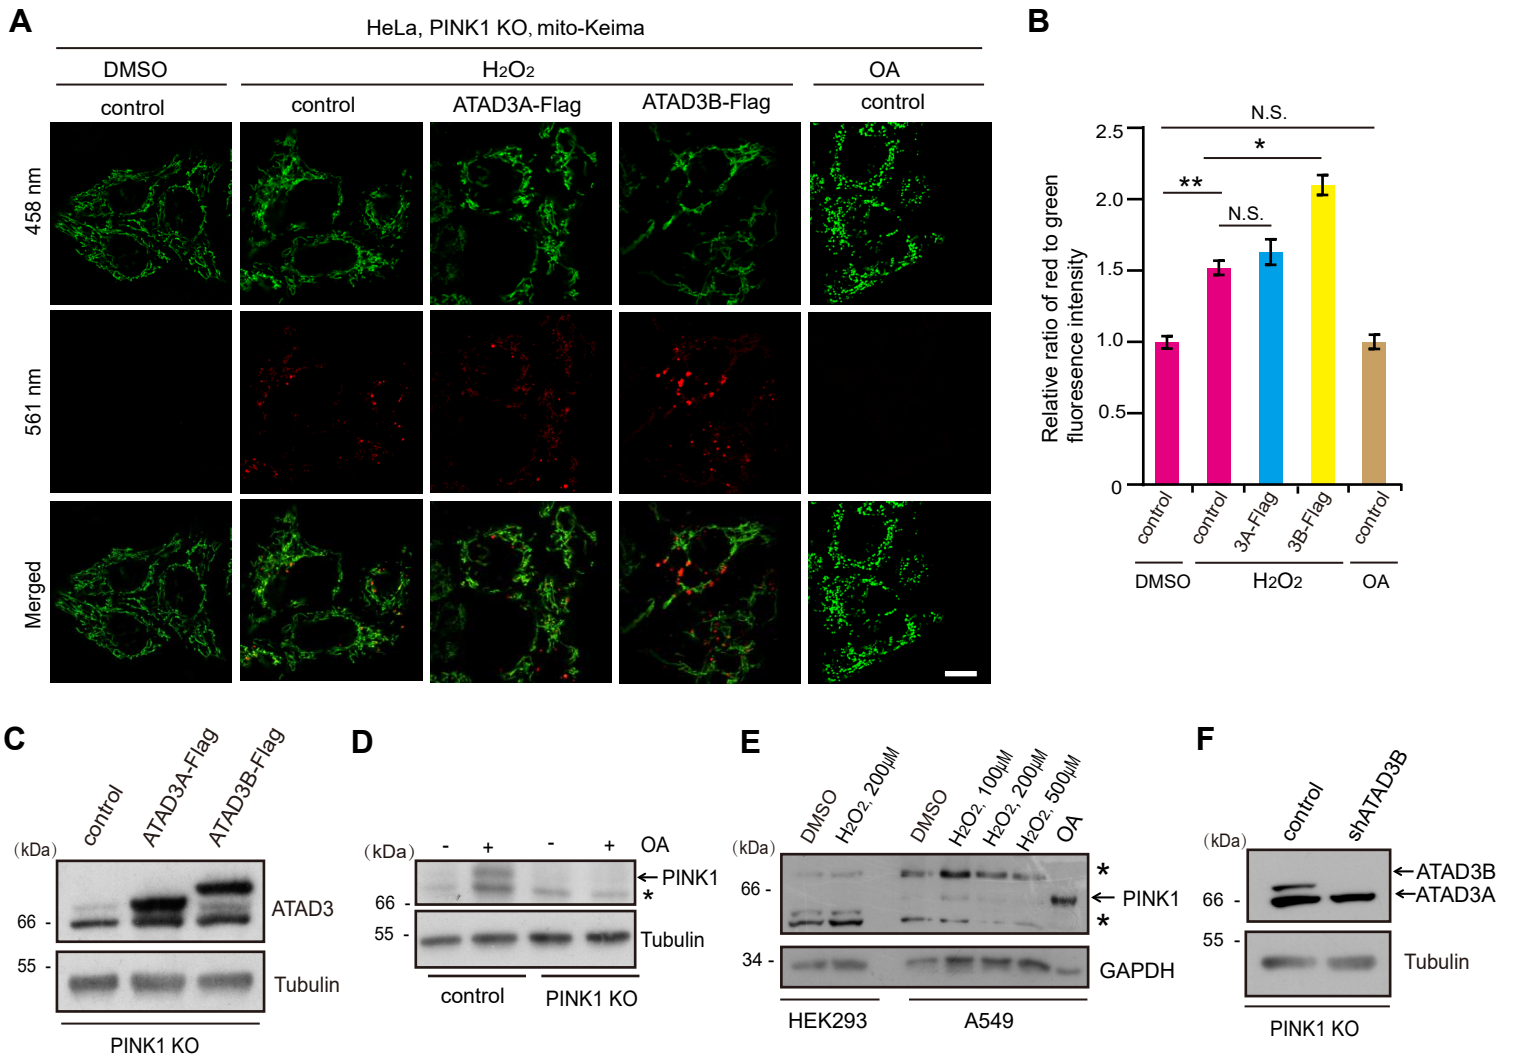



## Supplemental Experimental Tables

### Appendix Table S1. List of primers for construction of knockdown (KD) or knockout (KO) plasmids.

Targeted gene sequences for knockdown were listed in *italic*, **bold** and underline.

| Target gene                                                        | Oligonucleotides sequence                                                                                                                                                 |
|--------------------------------------------------------------------|---------------------------------------------------------------------------------------------------------------------------------------------------------------------------|
| Homo ATAD3A<br>(ATAD3A KO-1)                                       | F 5' -CACCGAATGAGATGCTGCGAGTGG-3'<br>R 5' -AAACCCACGCGCAGCATCTCATTTC-3'                                                                                                   |
| Homo ATAD3A<br>(ATAD3A KO-2)                                       | F 5' -CACCGCCCCAAGGGTGAAGGCGCG-3'<br>R 5' -AAACCGCGCCTTCACCCTTGGGGC-3'                                                                                                    |
| Homo ATAD3B<br>(ATAD3B KO-1)                                       | F 5' -CACCGGCGGCGGGGACCGCGGTTT-3'<br>R 5' -AAACAAACCGCGGTCCCCGCGCC-3'                                                                                                     |
| Homo ATAD3B<br>(ATAD3B KO-2)                                       | F 5' -CACCGCCGGCCGGTCTCCCAAACCG-3'<br>R 5' -AAACCGGTTTGGGAGACCGGCCGGC-3'                                                                                                  |
| Homo ATAD3<br>(ATAD3 KD-1, targeting<br>both ATAD3A and<br>ATAD3B) | F5'-GATCCCC <u><b>CGTGGCTCTTCGGCATTAA</b></u> TTCAAGAGA<br>TTAATGCCGAAGAGCCACGTTTTTGGAAA-3'<br>R5'-AGCTTTTCCAAAACGTGGCTCTTCGGCATTAA<br>TCTCTTGAATTAATGCCGAAGAGCCACGGGG-3' |
| Homo ATAD3<br>(ATAD3 KD-2, targeting<br>both ATAD3A and<br>ATAD3B) | F5'-GATCCCC <u><b>GCAGCAGCGACTTCTCAAT</b></u> TTCAAGAGA<br>ATTGAGAAGTCGCTGCTGCTTTTTTGGAAA-3'<br>R5'-AGCTTTTCCAAAAGCAGCAGCGACTTCTCAAT<br>TCTCTTGAATTGAGAAGTCGCTGCTGCGGG-3' |
| Homo ATAD3B<br>(ATAD3B KD-1)                                       | F5'-GATCCCC <u><b>GGCCAACACAGCAACAAT</b></u> TTCAAGAGA<br>ATTTGTTGCTGTGTTGGCCTTTTTTGGAAA-3'<br>R5'-AGCTTTTCCAAAAGGCCAACACAGCAACAAT<br>TCTCTTGAATTGTTGCTGTGTTGGCCGGG-3'    |
| Homo ATAD3B<br>(ATAD3B KD-2)                                       | F5'-GATCCCC <u><b>GGGCCAGTATCAAGACAA</b></u> TTCAAGAGA<br>TTGTCTTGATACTGGGCCCTTTTTTGGAAA-3'<br>R5'-AGCTTTTCCAAAAGGGCCCAGTATCAAGACAA<br>TCTCTTGAATTGTCTTGATACTGGGCCCGGG-3' |
| Homo ATG5<br>(ATG5 KD)                                             | F5'-GATCCCC <u><b>CCTTTCATT CAGAAGCTGT</b></u> TTCAAGAGA<br>ACAGCTTCTGAATGAAAGGTTTTTGGAAA-3'<br>R5'-AGCTTTTCCAAAACCTTTCATT CAGAAGCTGT                                     |

|                              |                                                                                                                                                                      |
|------------------------------|----------------------------------------------------------------------------------------------------------------------------------------------------------------------|
|                              | TCTCTTGAAACAGCTTCTGAATGAAAGGGGG-3'                                                                                                                                   |
| Homo mtSSB<br>(mtSSB KD)     | F5'-GATCCCC <u>GGCATATCAATATGTGAAA</u> TTCAAGAGA<br>TTTCACATATTGATATGCCTTTTTGGAAA-3'<br>R5'-AGCTTTTCCAAAAGGCATATCAATATGTGAAA<br>TCTCTTGAATTTACACATATTGATATGCCGGG-3'  |
| Homo POLG2<br>(POLG2 KD)     | F5'-GATCCCC <u>GGAGGAGTTTCAACAAGAT</u> TTCAAGAGA<br>ATCTTGTTGAAACTCCTCCTTTTTGGAAA-3'<br>R5'-AGCTTTTCCAAAAGGAGGAGTTTCAACAAGAT<br>TCTCTTGAATCTTGTTGAAACTCCTCCGGG-3'    |
| Homo Twinkle<br>(Twinkle KD) | F5'-GATCCCC <u>GGCGGCTGGAAGATCAACT</u> TTCAAGAGA<br>AGTTGATCTTCCAGCCGCCTTTTTGGAAA-3'<br>R5'-AGCTTTTCCAAAAGGCGGCTGGAAGATCAACT<br>TCTCTTGAAGTTGATCTTCCAGCCGCCGGG-3'    |
| Homo LONP1<br>(LONP1 KD)     | F5'-GATCCCC <u>GCACGTCATGGATGTTGTG</u> TTCAAGAGA<br>CACAACATCCATGACGTGCTTTTTGGAAA-3'<br>R5'-AGCTTTTCCAAAAGCACGTCATGGATGTTGTG<br>TCTCTTGAACACAACATCCATGACGTGCGGG-3'   |
| Homo POLMRT<br>(POLMRT KD)   | F5'-GATCCCC <u>GGAGCTGGTATATGTGTTA</u> TTCAAGAGA<br>TAACACATATAACCAGCTCCTTTTTGGAAA-3'<br>R5'-AGCTTTTCCAAAAGGAGCTGGTATATGTGTTA<br>TCTCTTGAATAACACATATAACCAGCTCCGGG-3' |
| Homo TFAM<br>(TFAM KD)       | F5'-GATCCCC <u>GTGGCAGGTATATAAAGA</u> TTCAAGAGA<br>TTCTTTATATACCTGCCACTTTTTGGAAA-3'<br>R5'-AGCTTTTCCAAAAGTGGCAGGTATATAAAGAA<br>TCTCTTGAATTTCTTTATATACCTGCCACGGG-3'   |
| Homo PHB2<br>(siPHB2)        | F5' -AGAUAAACACCAACCCAGGAAUUCT-3'<br>R5' -AGAAUCCUGGGUUGGUGUUUAUCUCC-3'                                                                                              |

**Appendix Table S2. List of primers for quantitative real-time PCR.**

| <b>Primes</b>                                        | <b>Oligonucleotides sequence</b>                                                                             |
|------------------------------------------------------|--------------------------------------------------------------------------------------------------------------|
| 8.9kb segments of human mitochondrial DNA            | F5' -TCTAAGCCTCCTTATTTCGAGCCGA-3'<br>R5' -TTTCATCATGCGGAGATGTTGGATGG-3'                                      |
| 12.2kb segments of human nuclear DNA                 | F5' -CATGTCACCACTGGACTCTGAAC-3'<br>R5' -CCTGGAGTAGGAACAAAATTGCT-3'                                           |
| 221bp fragment of the human mitochondrial DNA        | F5' -CCCCACAAACCCCATTAATAACCCA-3'<br>R5' -TTTCATCATGCGGAGATGTTGGATGG-3'                                      |
| 10kb segment of mouse mitochondrial DNA              | F5' -GCCAGCCTGACCCATAGCCATAATAT-3'<br>R5' -GAGAGATTTTATGGGTGTAATGCGG-3'                                      |
| Mouse 6.6kb fragment of the DNA polymerase beta gene | F5' -TATCTCTCTTCTCTTCACTTCTCCCCTGG-3'<br>R5' -CGTGATGCCGCCGTTGAGGGTCTCCTG-3'                                 |
| 117bp fragment of mouse mitochondrial DNA            | F5'-CCCAGCTACTACCATCATTCAAGT-3'<br>R5'-GATGGTTTGGGAGATTGGTTGATGT-3'                                          |
| Taqman probe for 3243G of human mitochondrial DNA    | F5' -CCACACCCACCCAAGAACAG-3'<br>R5' -TATGTTGTTAAGAAGAGGAATTGAACCT-3'<br>Probe, 5' -FAM-TAAGATGGCAGGGC-MGB-3' |
| Tubulin (homo)                                       | F5'-GACCTGACTGACTACCTCATGAAGAT-3'<br>R5'- GTCACACTTCATGATGGAGTTGAAGG-3'                                      |
