# Supplementary material
Source: PubMed Central journal article supplement (PMC8047441)

# F3C

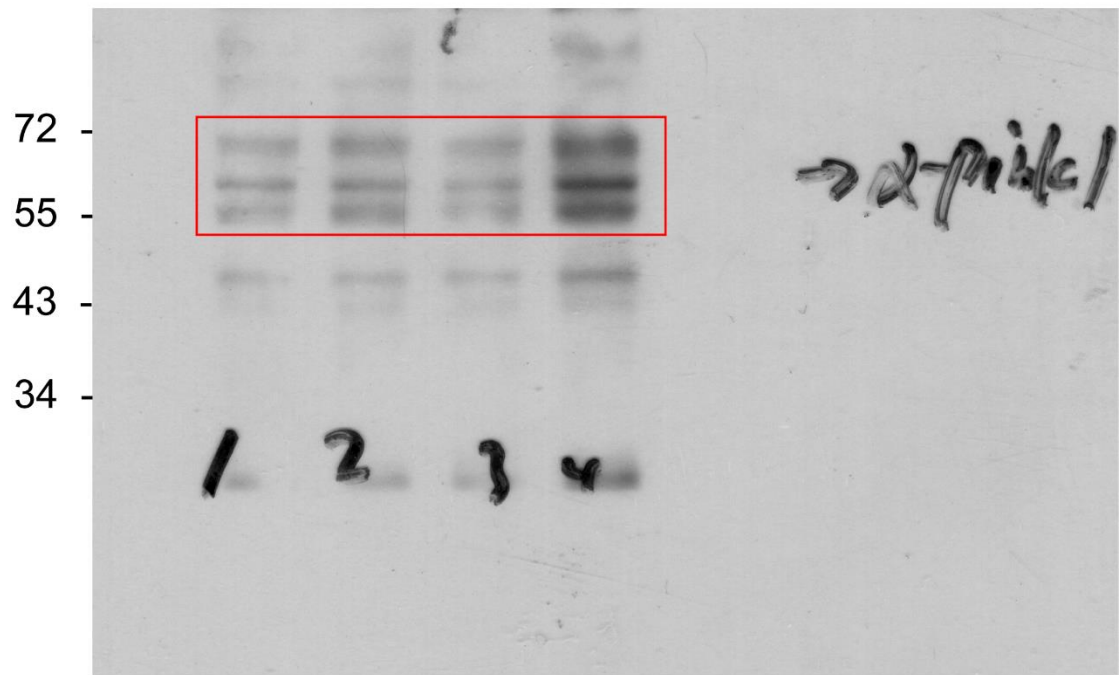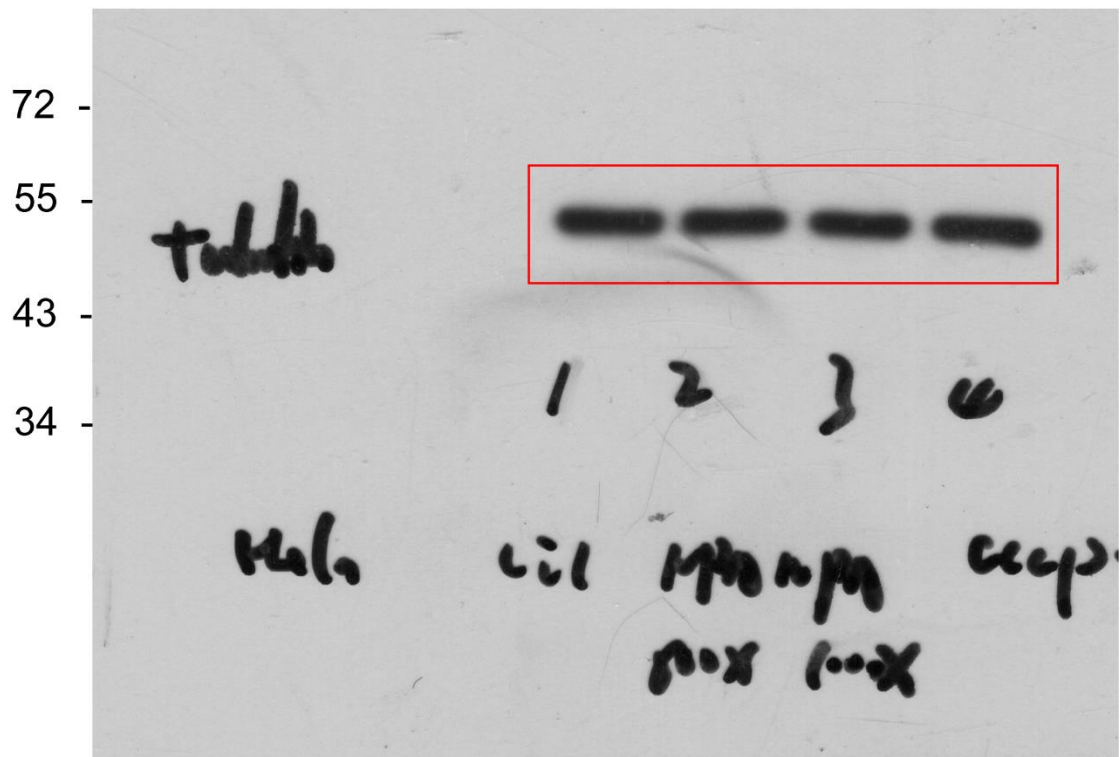

Supplement: EMBJ-40-e106283-s002.pdf [file EMBJ-40-e106283-s002.pdf]

**F5B**

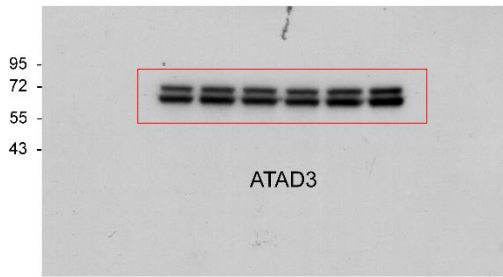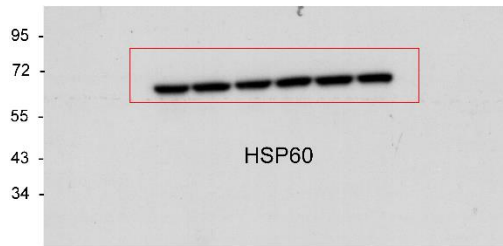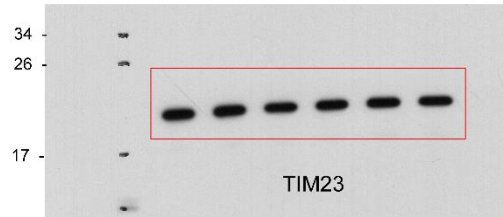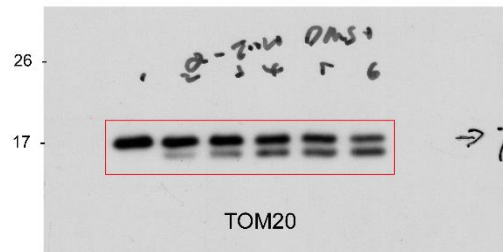

**F5D**

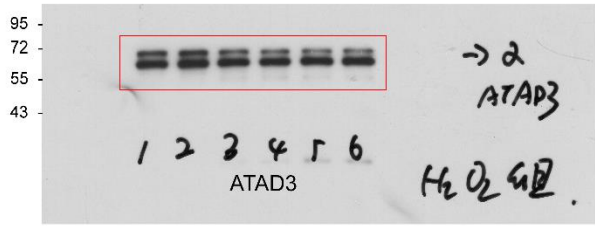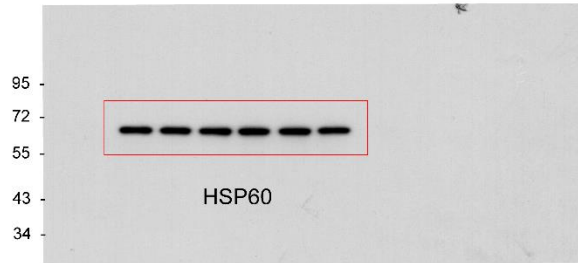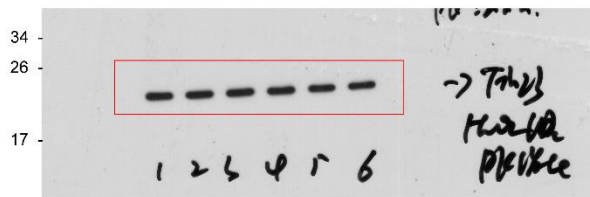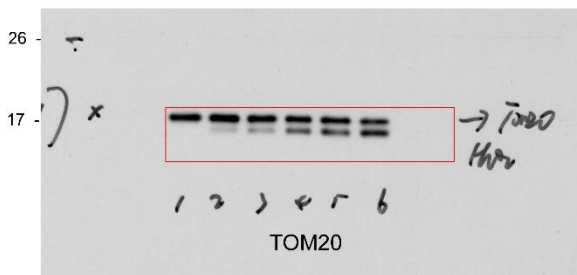

**F5F**

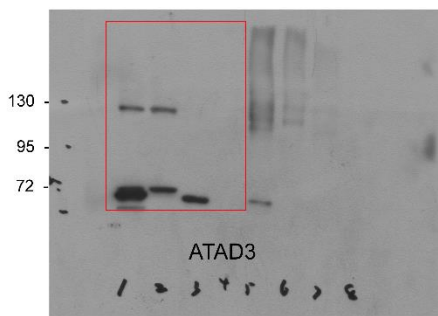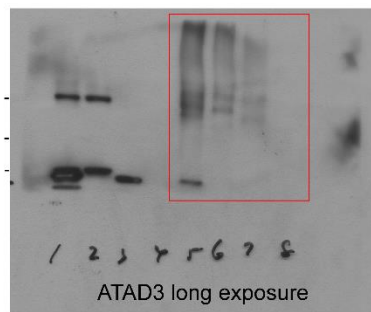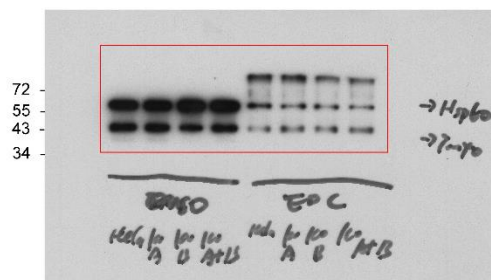

**F5G**

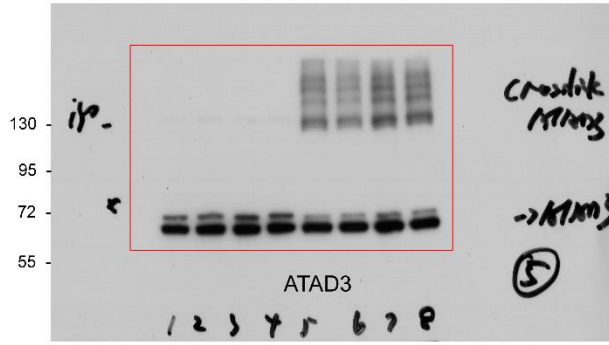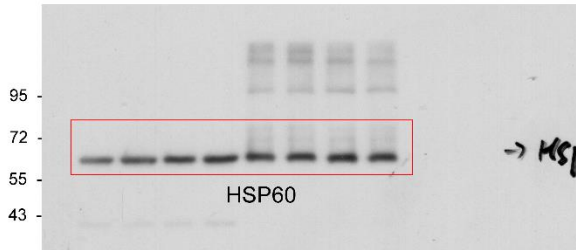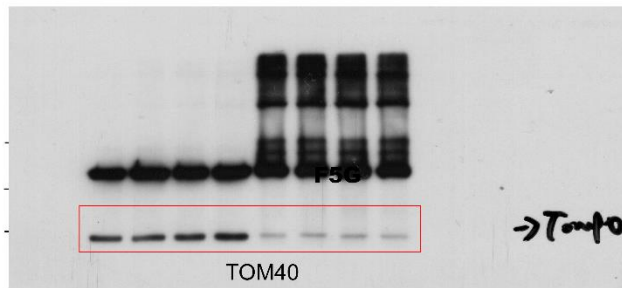

**F5I**

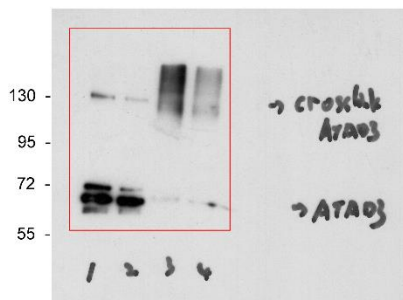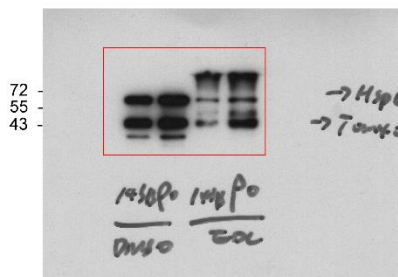

**F5J**

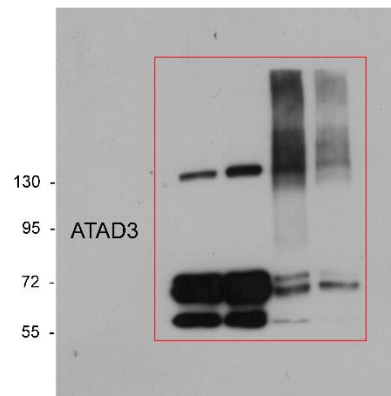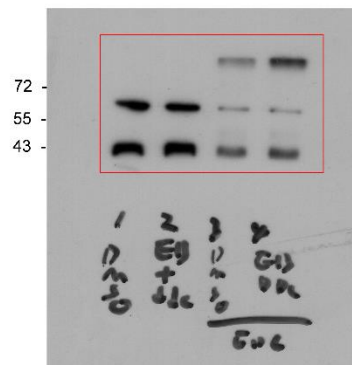

**F5K**

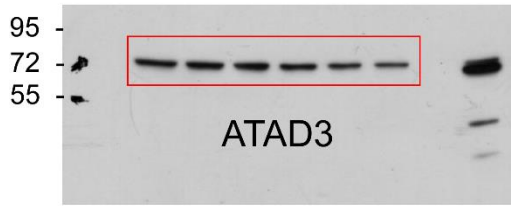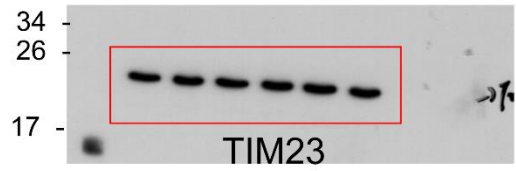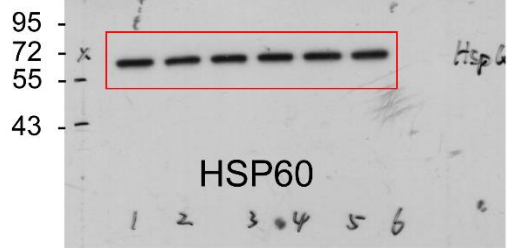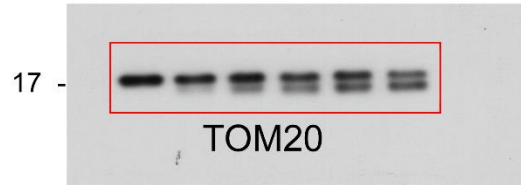

Supplement: EMBJ-40-e106283-s005.pdf [file EMBJ-40-e106283-s005.pdf]

F4A

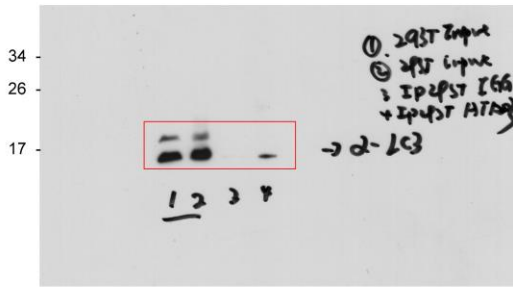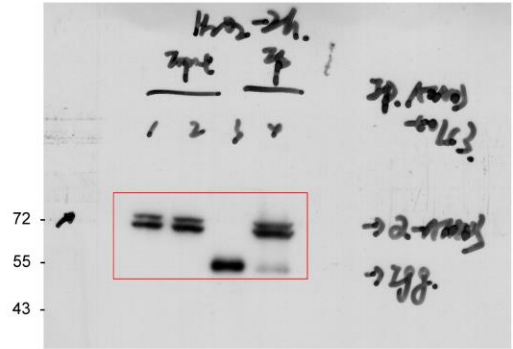

F4B

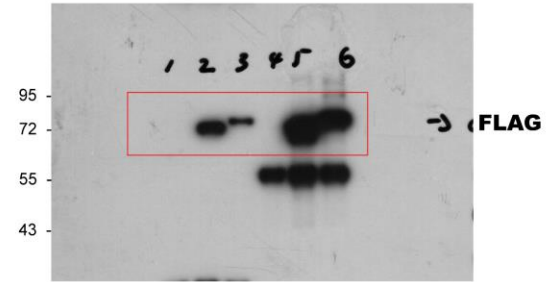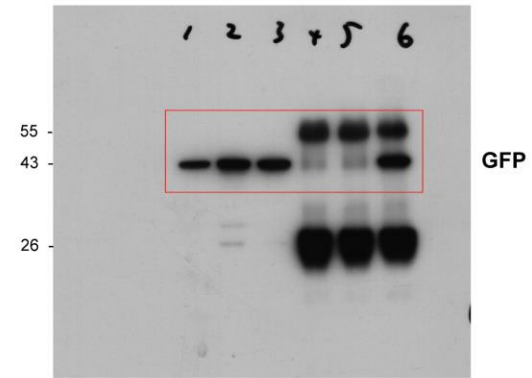

F4C

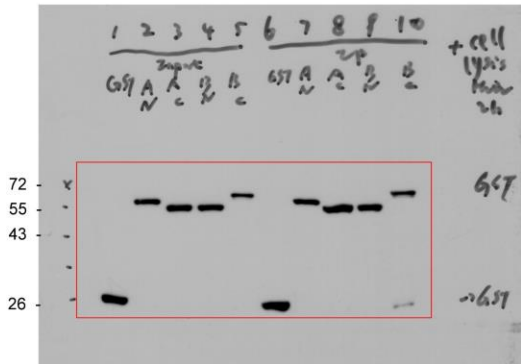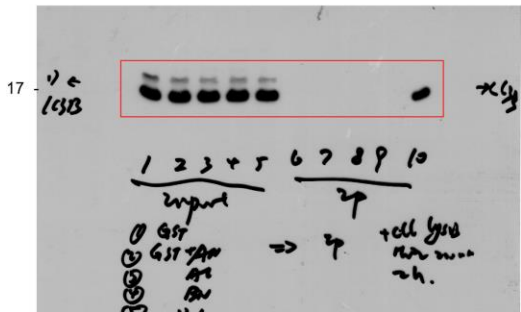

F4D

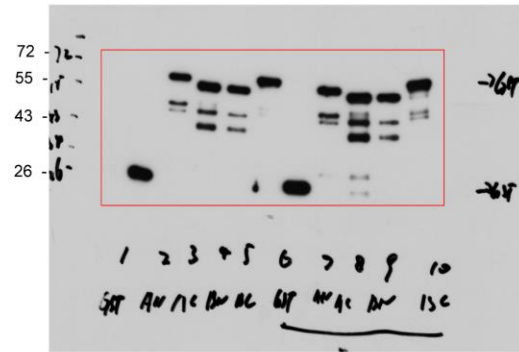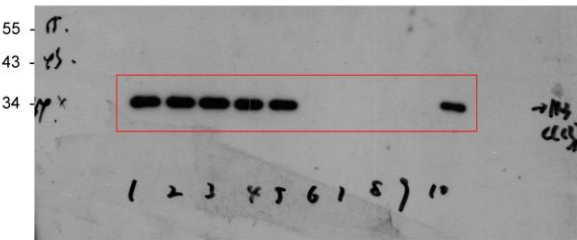

**F4F**

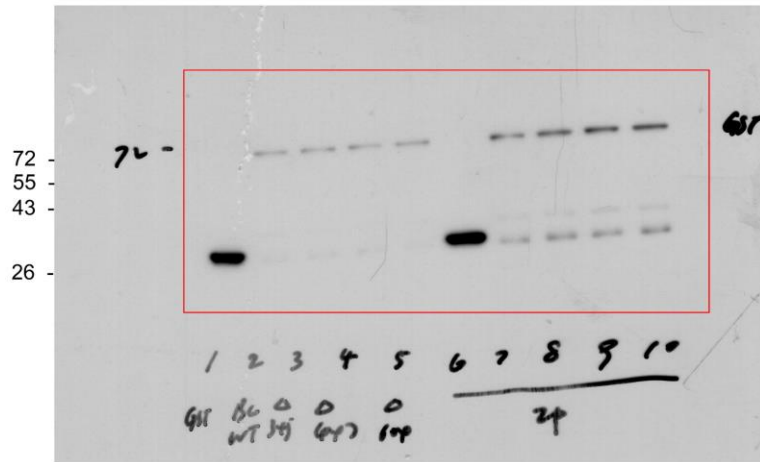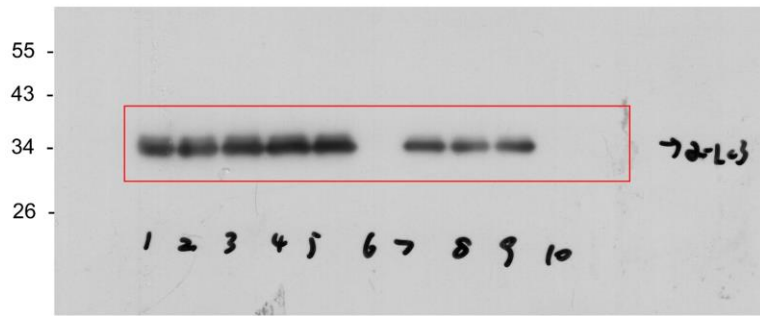

**F4I**

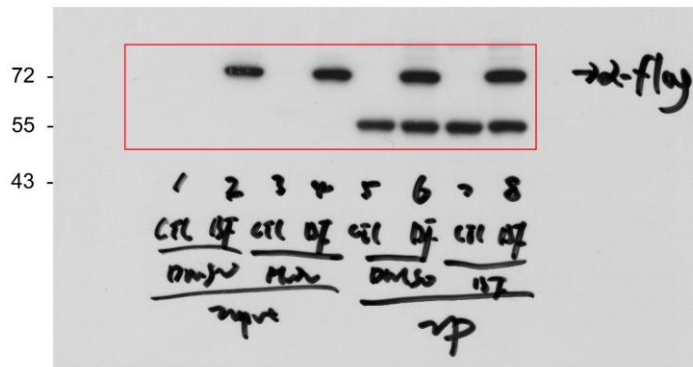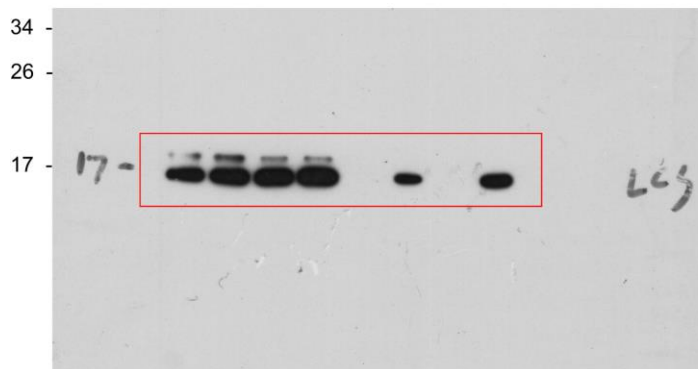

Supplement: EMBJ-40-e106283-s006.pdf [file EMBJ-40-e106283-s006.pdf]

**F6C**

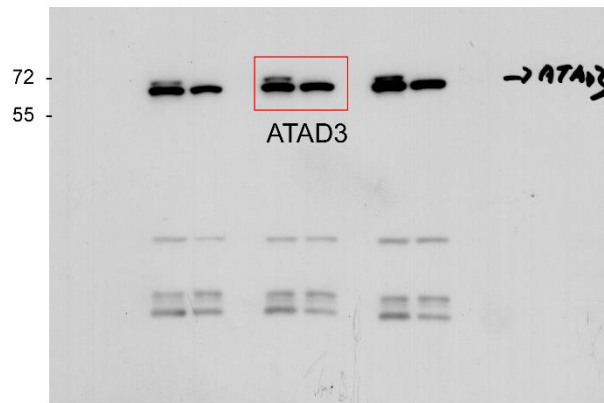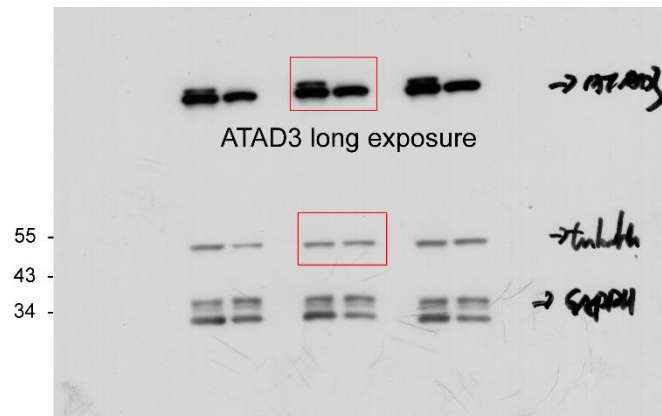

**F6D**

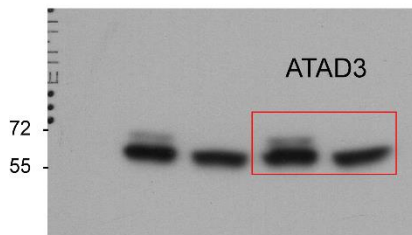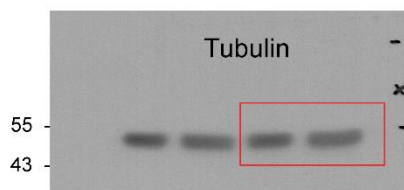

**F6E**

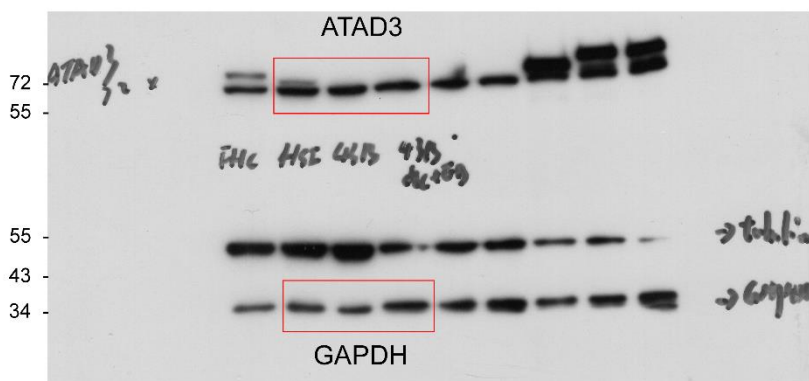

Supplement: EMBJ-40-e106283-s008.pdf [file EMBJ-40-e106283-s008.pdf]
